# Supplementary material for: Silencing circRNA_001937 may inhibit cutaneous squamous cell carcinoma proliferation and induce apoptosis by preventing the sponging of the miRNA-597-3p/FOSL2 pathway
Source: PubMed Central journal article supplement — Int J Mol Med. 2020 Sep 10;46(5):1653–60. doi: 10.3892/ijmm.2020.4723 (PMC7521585; doi:10.3892/ijmm.2020.4723), 2020-09-10
Supplement: Supplementary_Data.pdf [file Supplementary_Data.pdf]

Table SI. Clinicopathological features of the patients.

| Patient characteristic | Patient 1 | Patient 2 | Patient 3 |
|------------------------|-----------|-----------|-----------|
| Age, years             | 65        | 60        | 52        |
| Sex                    | Male      | Female    | Male      |
| Pathological stage     | High      | Low       | Low       |
| Tumor size, cm         | 1.8       | 2.1       | 2.5       |
| Infiltration depth, cm | 0.7       | 0.9       | 1.1       |
| Tumor-Node-Metastasis  | T1N0M0    | T2N0M0    | T2N0M0    |
| Surgical treatment     | Yes       | Yes       | Yes       |
